# Supplementary material
Source: PubMed Central journal article supplement (PMC2664149)
Supplement: ddp058_2.pdf [file ddp058_2.pdf]

| Gene                                                   | <i>HSA</i> <sup>LR</sup> 41 vs wt<br>Microarray |          | <i>HSA</i> <sup>LR</sup> 20b vs wt<br>Microarray |          | <i>HSA</i> <sup>LR</sup> 41 vs wt<br>qRT-PCR |          | <i>HSA</i> <sup>LR</sup> 20b vs wt<br>qRT-PCR |          |
|--------------------------------------------------------|-------------------------------------------------|----------|--------------------------------------------------|----------|----------------------------------------------|----------|-----------------------------------------------|----------|
|                                                        | FC                                              | <i>P</i> | FC                                               | <i>P</i> | FC                                           | <i>P</i> | FC                                            | <i>P</i> |
| Sarcolipin                                             | 73                                              | 6.0E-07  | 98                                               | 2.8E-06  | 61                                           | 3.8E-04  | 60                                            | 3.3E-04  |
| Myosin IA                                              | 29                                              | 7.0E-05  | 18                                               | 1.2E-06  | 22                                           | 9.7E-08  | 17                                            | 9.2E-08  |
| Ubiquitin carboxy-terminal<br>hydrolase L1             | 25                                              | 3.4E-03  | 20                                               | 4.6E-12  | 3.8                                          | 5.2E-04  | 3.5                                           | 4.7E-05  |
| Copine II                                              | 10                                              | 7.2E-07  | 14                                               | 3.4E-06  | 6.1                                          | 5.6E-04  | 4.8                                           | 2.2E-03  |
| Ectodysplasin A2 isoform<br>receptor                   | 5.2                                             | 1.7E-05  | 9.8                                              | 2.8E-06  | 8.4                                          | 1.4E-03  | 9.4                                           | 1.6E-03  |
| Caspase 12                                             | -2.2                                            | 9.8E-03  | -5.3                                             | 5.8E-05  | -1.4                                         | 0.02     | -2.8                                          | 5.5E-05  |
| Voltage-gated K <sup>+</sup> channel<br>β<br>subunit 1 | -3.6                                            | 3.4E-04  | -25                                              | 2.8E-07  | -2.1                                         | 4.9E-03  | -14                                           | 1.1E-04  |
| Myosin 15                                              | 1.0                                             | 0.75     | 1.0                                              | 0.55     | -1.1                                         | 0.67     | 1.2                                           | 0.41     |

Supplemental Table 3. Quantitative RT-PCR analysis of seven transcripts that showed altered expression by microarray in *HSA*<sup>LR</sup> mice. Myosin 15 served as control for transcripts whose expression was unchanged on the microarray study. FC, fold change; *P*, nominal *P* value by *t*-test.
